# Supplementary material
Source: Springer Nature journal article supplement (https://www.springermedizin.de/resource/supplementary/12911_2011_518_MOESM1_ESM.pdf/9525982)
Supplement: MOESM1 [file 9525982]

## **ALGORITHM:**

**Age:** All citizens ages 35 and up at the time of identification in the registry.

**Vital status:** Alive at the time of identification in the registry.

**Selection of COPD patients:** People who meet at least one of the following criteria can be sampled as possible patients with COPD:

**1. Hospital contact.** People who have been hospitalised or have had an outpatient visit at least once during the last 5 years with one or more of the following ICD-10 codes as main diagnosis:

|                                                                                 |        |
|---------------------------------------------------------------------------------|--------|
| Bronchitis without specification                                                | DJ40   |
| Bronchitis without specification                                                | DJ409  |
| Simple and mucopurulent chronic bronchitis                                      | DJ41   |
| Bronchitis chronica simplex                                                     | DJ410  |
| Bronchitis chronica mucopurulenta                                               | DJ411  |
| Bronchitis chronica simplex et mucopurulenta, mixed type                        | DJ418  |
| Chronic bronchitis without specification                                        | DJ42   |
| Chronic bronchitis without specification                                        | DJ429  |
| Tracheobronchitis chronica                                                      | DJ429A |
| Tracheitis chronica                                                             | DJ429B |
| Expansion of the lungs                                                          | DJ43   |
| MacLeod's syndrome                                                              | DJ430  |
| Emphysema pulmonum unilaterale                                                  | DJ430A |
| Emphysema pulmonum panlobulare                                                  | DJ431  |
| Emphysema pulmonum panacinare                                                   | DJ431A |
| Emphysema pulmonum centrilobulare                                               | DJ432  |
| Emphysema, other kinds                                                          | DJ438  |
| Emphysema without specification                                                 | DJ439  |
| Emphysema pulmonum bullosum                                                     | DJ439A |
| Chronic obstructive lung disease, other                                         | DJ44   |
| Chronic obstructive lung disease, with acute lower respiratory tract infection  | DJ440  |
| Chronic obstructive lung disease, with acute exacerbation without specification | DJ441  |
| Chronic obstructive lung disease, other specified version                       | DJ448  |
| Bronchitis chronica obstructive                                                 | DJ448A |
| Bronchitis chronica asthmatica                                                  | DJ448B |
| Chronic obstructive lung disease without specification                          | DJ449  |
| Expansion of bronchia                                                           | DJ47   |
| Bronchiectasia                                                                  | DJ479  |
| Respiratory insufficiency not classified any other place                        | DJ96   |
| Insufficiencia respiratoria acuta                                               | DJ960  |
| Insufficiencia respiratoria chronic                                             | DJ961  |
| Respiratory insufficiency without specification                                 | DJ969  |

Only the diagnosis coding was examined, not the way the patients have been referred or any other matters.

**2. COPD medicine.** People who within the last 12 months from the time of identification from the register have redeemed at least 2 prescriptions on different dates with one or more, of the following ATC codes: R03AC; R03AK; R03BA; R03BB; R03CC; R03DA; R03DC; V03AN01

**3. Spirometry in general practice.** People who, within the last 12 months from the time of identification in the register, have had at least 2 spirometry tests on different dates and defined as a fee for lab test called:

7113 Expanded lung function test verified by spirometry or

7121 Double lung function test for exertion provoked asthma or reversibility test done by spirometry in the same consultation.
